# Supplementary material
Source: PubMed Central journal article supplement (PMC3458381)
Supplement: 1213454109_pnas.201213454SI.pdf [file 1213454109_pnas.201213454SI.pdf]

# Supporting Information

Carmichael et al. 10.1073/pnas.1213454109

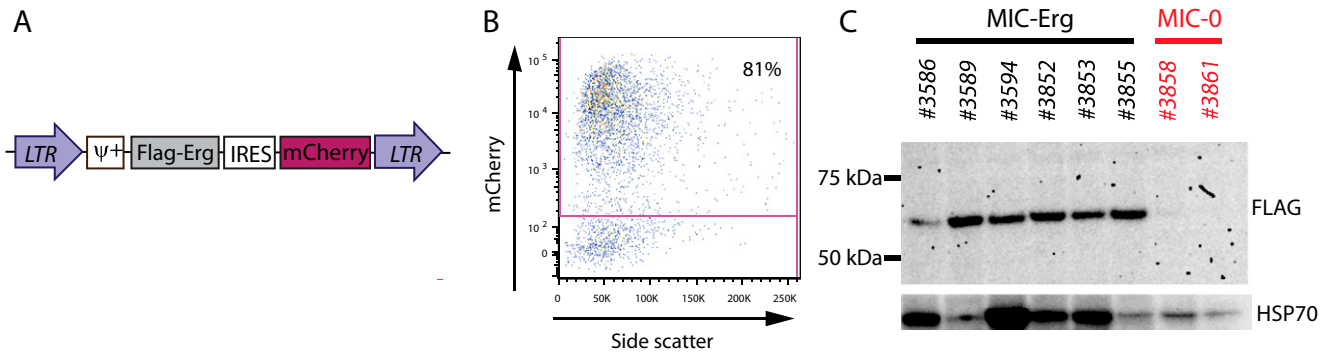

**Fig. S1.** A MSCV-based retrovirus carrying the cDNA encoding murine Erg was used to transduce hematopoietic cells. (A) Schematic of the retroviral construct containing the Erg cDNA downstream of a long terminal repeat (LTR) promoter. An internal ribosome entry site (IRES) sequence allows the mCherry reporter gene to be translated from the same promoter as Erg. (B) Transduction efficiency in FLCs was greater than 80%, as determined by expression of the mCherry marker. (C) Expression of the N-terminal FLAG-Tagged Erg protein was confirmed by Western blot analysis using an anti-FLAG monoclonal antibody.

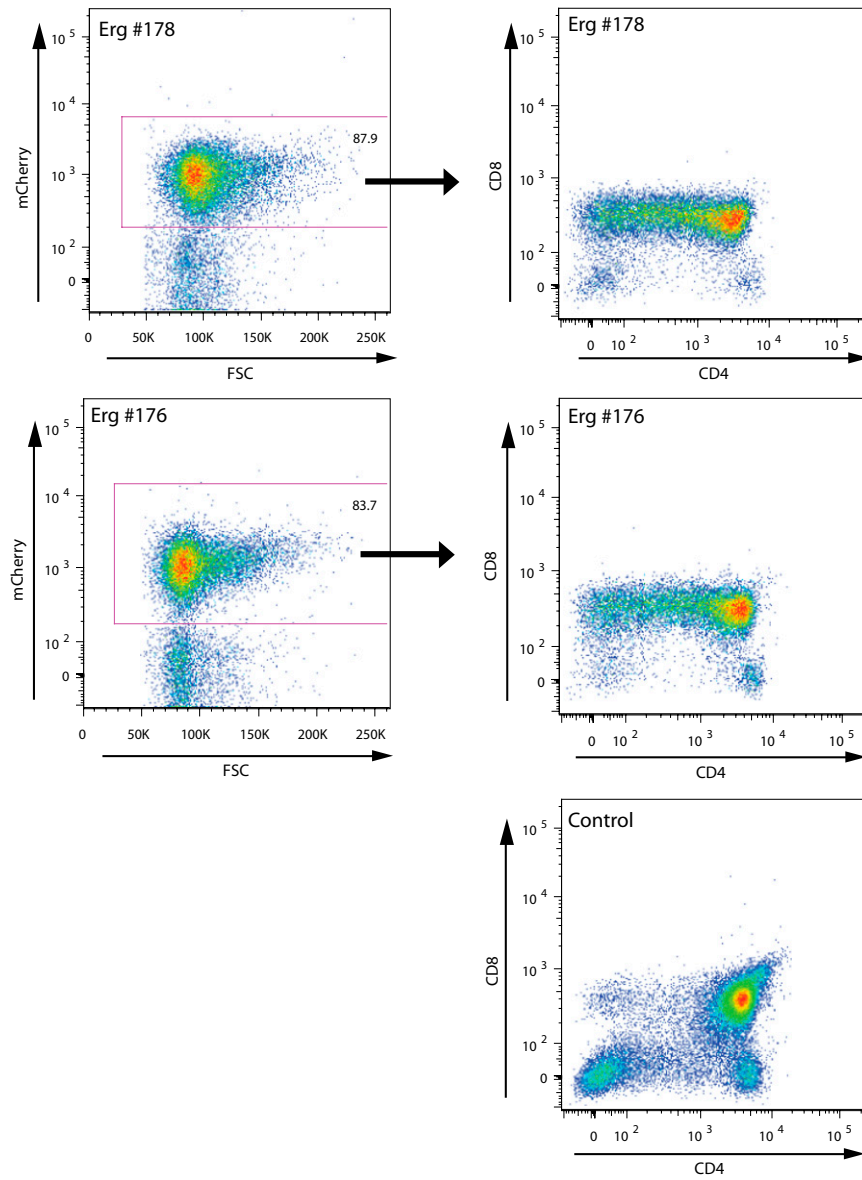

**Fig. S2.** Flow cytometric analysis of thymus from Erg mice histopathologically diagnosed with lymphoid leukemia. Thymus cells from leukemic mice (Erg nos. 176 and 178) are >80% mCherry<sup>+</sup> and have an altered CD4/CD8 profile compared with thymus cells from a control mouse (Control). Two representative Erg mice and a control mouse are shown.



**Table S2. Colony formation by bone marrow of leukemic (*n* = 7) and control (*n* = 4) mice**

| Mouse and stimulus                 | No. of colonies |         |        |         |       |         | Comments                      |
|------------------------------------|-----------------|---------|--------|---------|-------|---------|-------------------------------|
|                                    | Blast           | G       | GM     | M       | Eo    | Meg     |                               |
| <b>Erg leukemic (<i>n</i> = 7)</b> |                 |         |        |         |       |         |                               |
| GM-CSF                             |                 | 17 ± 9  | 7 ± 5  | 62 ± 21 | 1 ± 1 |         | 4/7 multinucleate macrophages |
| G-CSF                              |                 | 10 ± 7  | 0 ± 0  | 0 ± 0   |       |         |                               |
| M-CSF                              |                 | 5 ± 3   | 4 ± 4  | 70 ± 41 |       |         |                               |
| Multi-CSF                          | 2 ± 2           | 27 ± 19 | 5 ± 4  | 26 ± 13 | 1 ± 1 | 1 ± 2   |                               |
| SCF + IL-3 + EPO                   | 5 ± 7           | 31 ± 18 | 9 ± 8  | 22 ± 13 | 1 ± 2 | 10 ± 8  | 21 ± 34 mini megs             |
| Saline                             |                 | 0 ± 0   | 0 ± 0  | 0 ± 0   |       |         |                               |
| <b>Control (<i>n</i> = 4)</b>      |                 |         |        |         |       |         |                               |
| GM-CSF                             |                 | 36 ± 5  | 7 ± 2  | 54 ± 3  | 4 ± 2 |         |                               |
| G-CSF                              |                 | 18 ± 2  | 0 ± 0  | 0 ± 0   |       |         |                               |
| M-CSF                              |                 | 4 ± 2   | 6 ± 13 | 77 ± 13 |       |         |                               |
| Multi-CSF                          | 3 ± 1           | 30 ± 11 | 12 ± 7 | 18 ± 6  | 5 ± 5 | 3 ± 2   |                               |
| SCF + IL-3 + EPO                   | 7 ± 5           | 49 ± 9  | 22 ± 8 | 30 ± 10 | 5 ± 2 | 24 ± 11 |                               |
| Saline                             |                 | 0 ± 0   | 0 ± 0  | 0 ± 0   |       |         |                               |

In agar cultures from leukemic bone marrow stimulated with GM-CSF, colonies containing multinucleate macrophages were observed. In agar cultures from leukemic bone marrow stimulated with SCF/IL-3/EPO, colonies containing very small acetylcholinesterase positive cells (mini megs) were also observed. This was not observed in control cultures. Blast, blast colonies; Eo, eosinophil colonies; G, granulocyte colonies; GM, granulocyte and macrophage mixed colonies; M, macrophage colonies; Meg, megakaryocyte colonies.
